# Supplementary material
Source: Royal Society of Chemistry journal article supplement (doi:10.1039/d6nj00400h)
Supplement: d6nj00400h1.pdf [file d6nj00400h1.pdf]

## Supporting Information

### *Ortho*-phenylenediamine-Pd Hybrid on Magnetic $\gamma$ -Fe<sub>2</sub>O<sub>3</sub> for Efficient Hydrogen Evolution Catalysis

Roohollah Ahmadi<sup>a</sup>, Mehdi Hatefi Ardakani<sup>\*a</sup>, Mohammad Sabet<sup>a</sup>, Esmail Heydari<sup>\*b</sup>

<sup>a</sup> Department of Chemistry, Faculty of Science, Vali-e-Asr University of Rafsanjan, Iran

<sup>b</sup> Department of Chemistry, Isfahan University of Technology, Isfahan 84156-83111, Iran

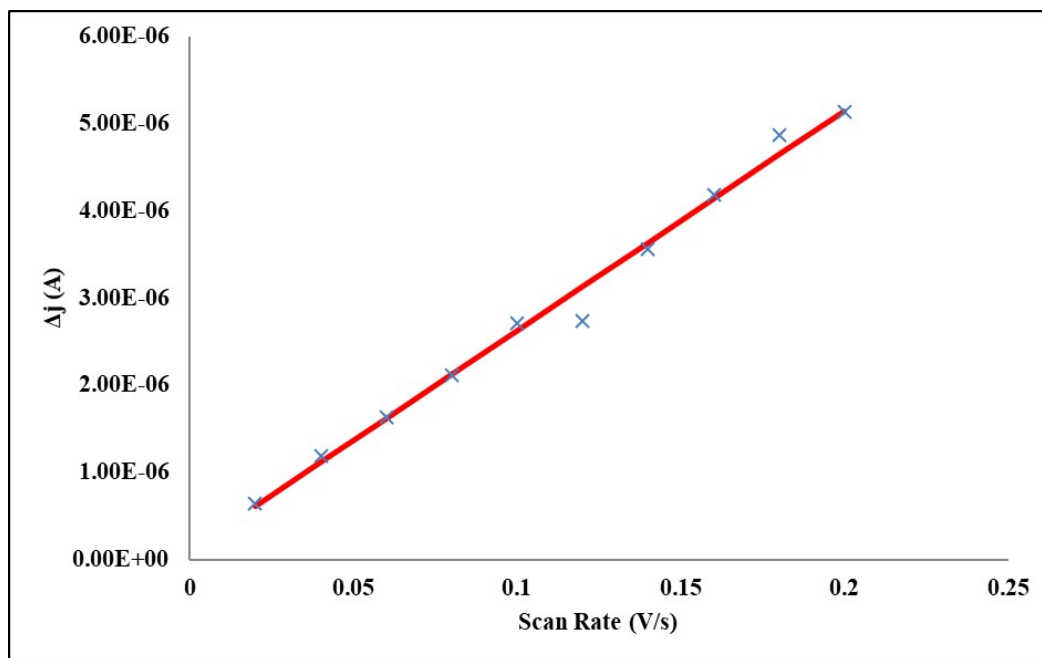

**Figure S1.** Linear relationship between current density and scan rate for  $\gamma$ -Fe<sub>2</sub>O<sub>3</sub>/OPD/PdCl<sub>2</sub> in the non-faradaic potential window of 0.2–0.3 V (vs. Ag/AgCl), used to determine the  $C_{dl}$  and estimate the ECSA.

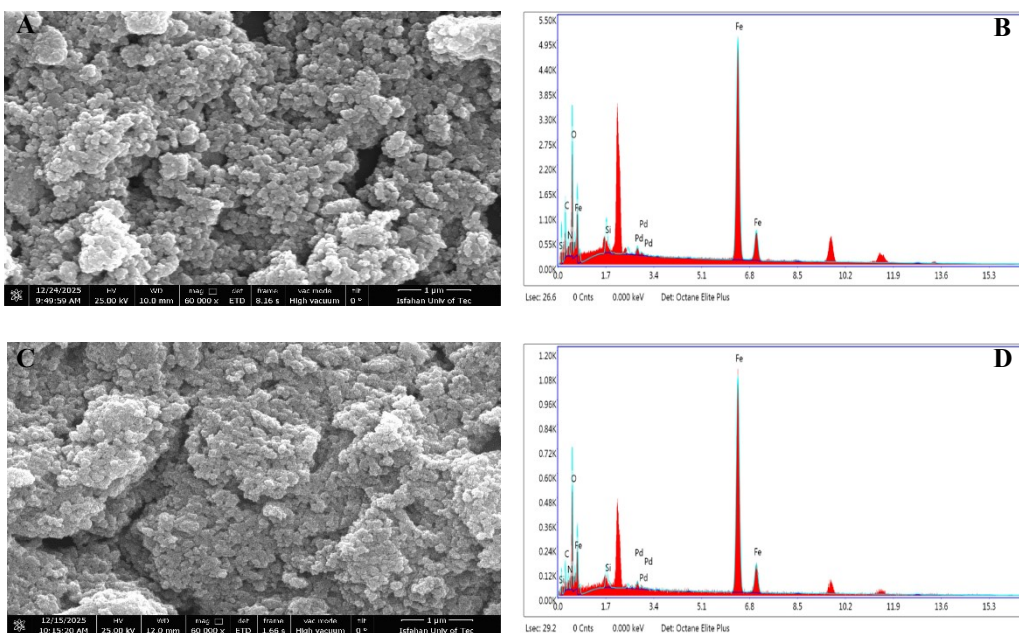

**Figure S2.** SEM images and EDS spectra of the  $\gamma\text{-Fe}_2\text{O}_3/\text{OPD}/\text{PdCl}_2$  catalyst: (A and B) fresh electrode and (C and D) electrode after 1000 potential cycles.

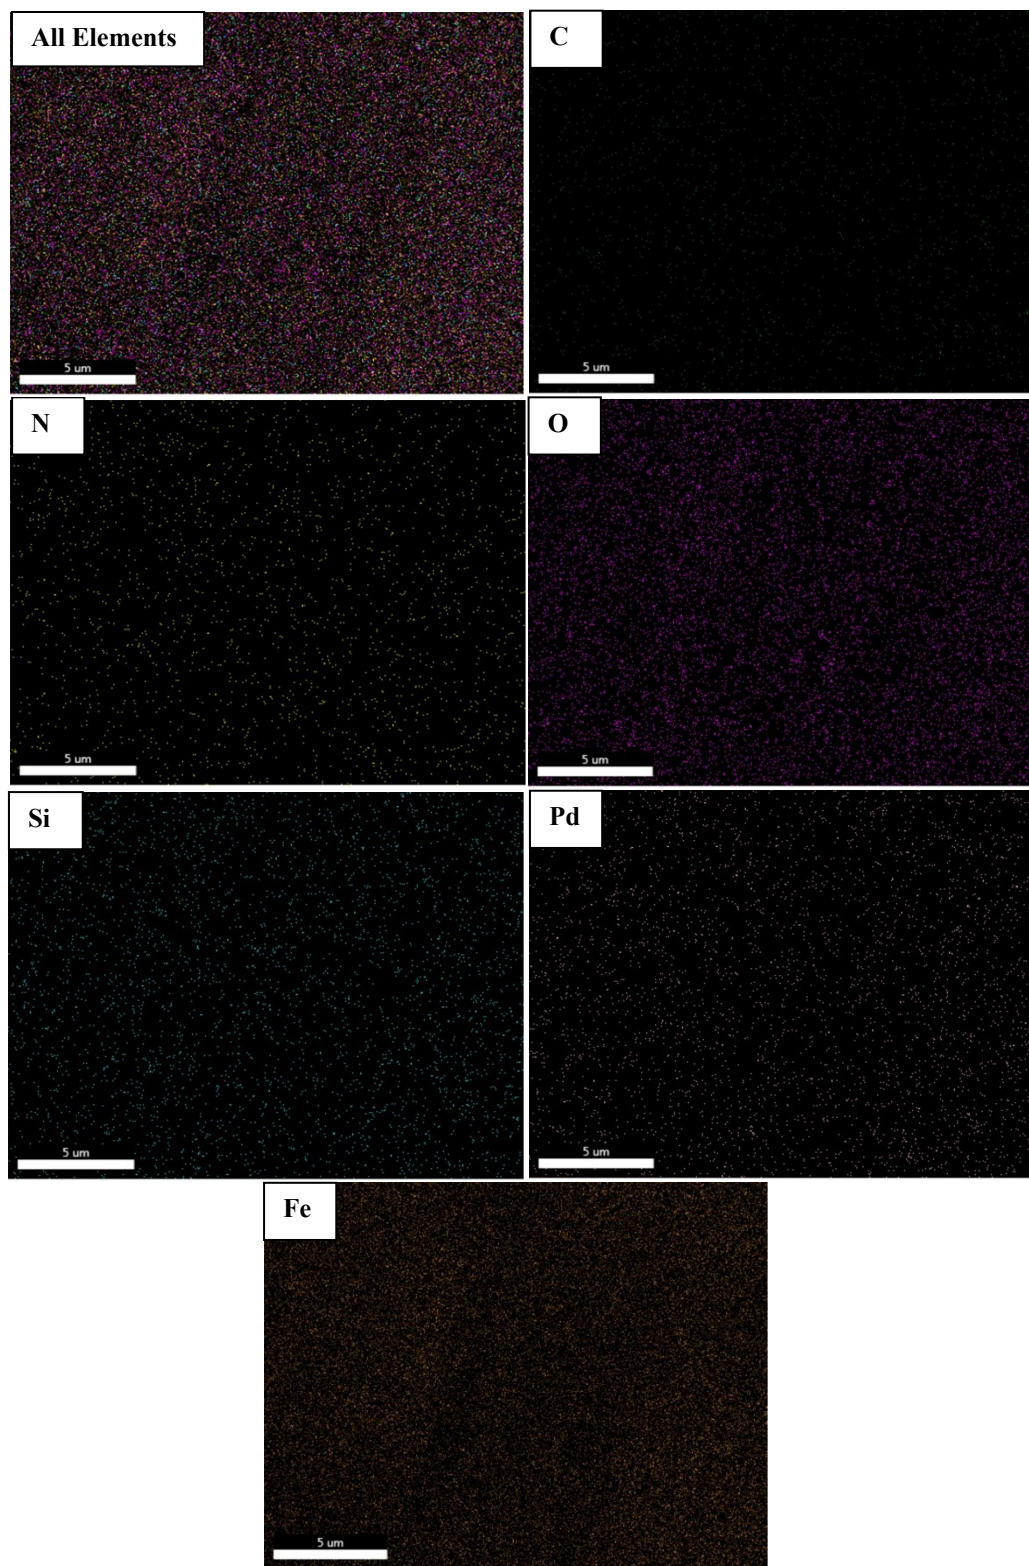

**Figure S3.** Elemental mapping of the  $\gamma\text{-Fe}_2\text{O}_3/\text{OPD}/\text{PdCl}_2$  catalyst for the fresh electrode.

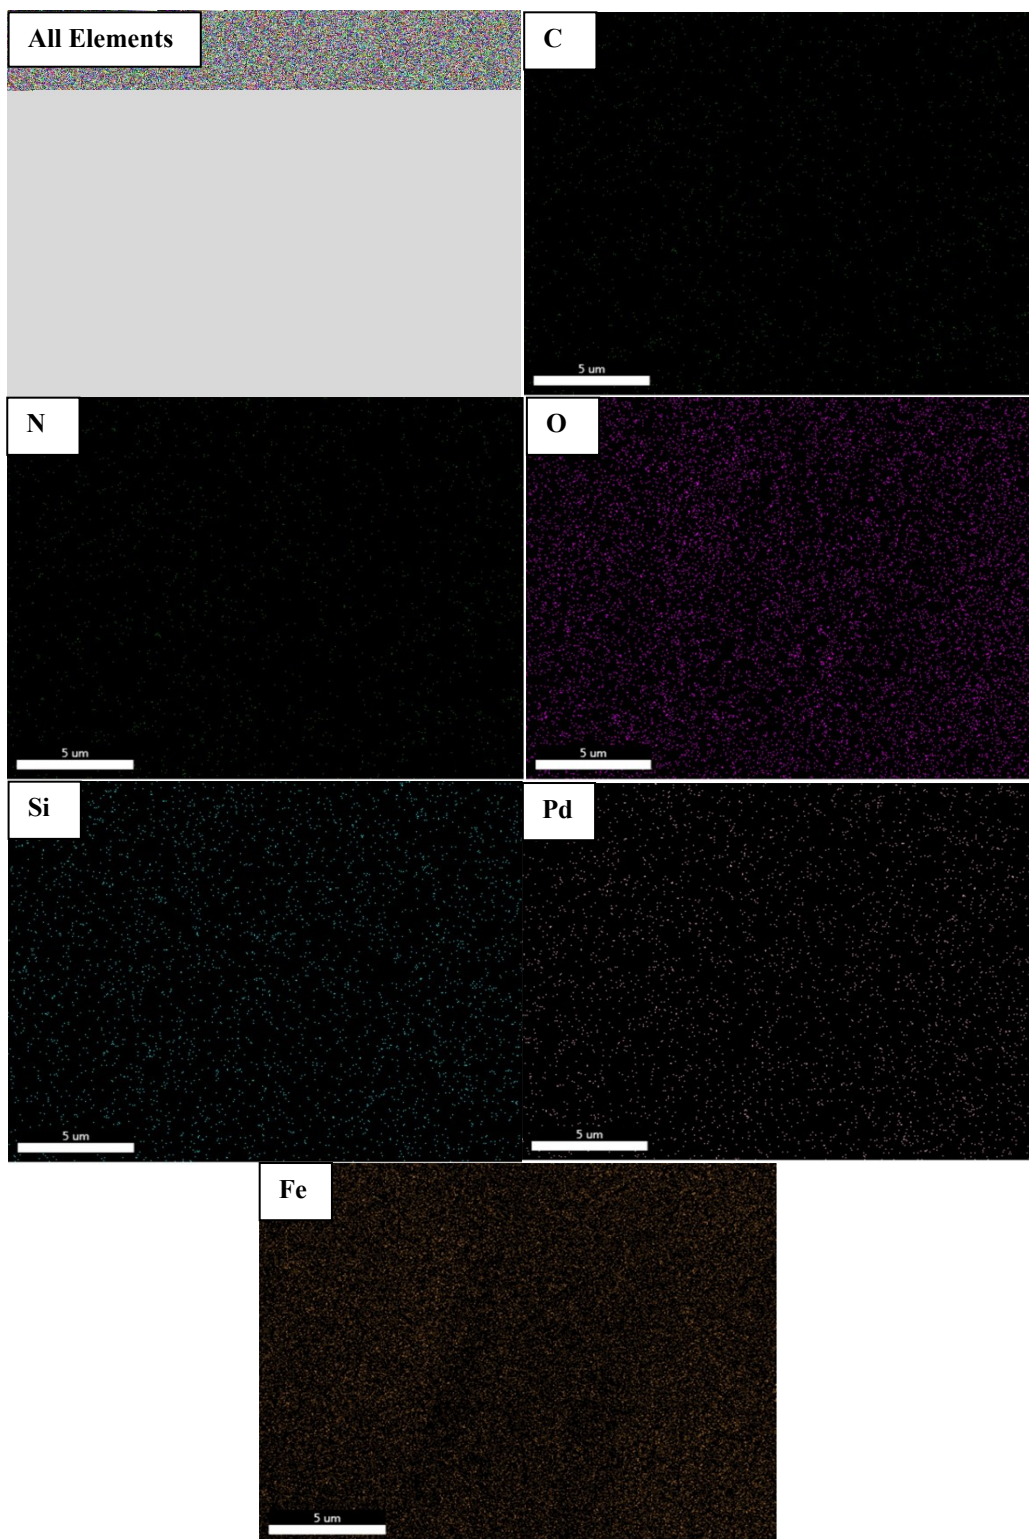

**Figure S4.** Elemental mapping of the  $\gamma\text{-Fe}_2\text{O}_3/\text{OPD}/\text{PdCl}_2$  catalyst for the electrode after 1000 potential cycles.
